1 ***Effects of silver diamine fluoride on oral bacteriome and mycobiome: a***  
2 ***randomized clinical trial***

3  
4 **Mayura Manerkar<sup>1,2</sup>, Vivianne Cruz de Jesus<sup>1,2</sup>, Betty-Anne Mittermuller<sup>1,2</sup>, Victor H. K. Lee<sup>1,2</sup>, Sarbjeet**  
5 **Singh<sup>2</sup>, Mary Bertone<sup>1</sup>, Prashen Chelikani<sup>1,2</sup>, Robert J. Schroth<sup>1,2,3\*</sup>**

6 <sup>1</sup>Rady Faculty of Health Sciences, University of Manitoba, Winnipeg, Manitoba, Canada

7 <sup>2</sup>Children's Hospital Research Institute of Manitoba, Winnipeg, Manitoba, Canada

8 <sup>3</sup>Shared Health Inc., Winnipeg, Manitoba, Canada

9 **\*Corresponding author:** Dr. Robert J. Schroth

10 E-mail: [robert.schroth@umanitoba.ca](mailto:robert.schroth@umanitoba.ca)

11  
12 **Abstract**

13 ***Introduction:*** Silver diamine fluoride (SDF) is a simple and non-invasive agent used to arrest early  
14 childhood caries (ECC). This study aimed to investigate potential changes to the oral microbiome in  
15 children with ECC who were treated with SDF at three different frequency regimens.

16 ***Methods:*** Forty-five children ( $n=15$  per group) with ECC were recruited into a randomized clinical trial  
17 testing three different treatment frequency regimens of SDF. A total of 195 carious lesions were treated  
18 with two applications of 38% SDF and 5% sodium fluoride varnish (NaFV) and assessed over three study  
19 visits (one month (Regimen 1M), four months (Regimen 4M), or six months (Regimen 6M) apart). Dental  
20 plaque samples were collected at each visit. Sequencing of the *V4-16S rRNA* and *ITS1 rRNA* genes were  
21 used to study the supragingival plaque microbiome.

22 ***Results:*** The overall arrest rates for treated carious lesions were 75.9% at Visit 2 and 92.8% at Visit 3.  
23 Arrest rates were higher for all lesions after two applications of SDF with NaFV, and applications one  
24 month and four months apart had higher arrest rates (95.9% and 98.5%) than six months (81.1%) apart.  
25 The microbial diversity analyses showed no significant differences in the overall microbiome after SDF

26 treatment. However, significant changes in the abundance of specific bacteria and fungi, particularly  
27 *Lactobacillus spp.*, *Bifidobacterium spp.*, and *Candida spp.* were observed after treatment. Furthermore,  
28 overabundance of *Streptococcus mutans* and *Candida dubliniensis* at baseline was observed in children  
29 who had at least one caries lesion not arrested after one SDF application, compared to those who had  
30 100% arrest rates.

31 **Conclusion:** SDF with NaFV applications were an effective modality for arresting ECC, with higher arrest  
32 rates after two SDF applications. No loss of diversity but significant changes in the abundance of specific  
33 bacteria and fungi were consequences of SDF treatment.

34 **Keywords:** dental caries, microbiome, bacteria, fungi, children, Clinical Trials, Randomized

## 35 **Introduction**

36 Early childhood caries (ECC), characterized by the presence of tooth decay in primary teeth in children  
37 younger than 6 years of age, is a multifactorial disease caused by a combination of factors including oral  
38 colonization with increased levels of cariogenic bacteria, decreased microbial diversity, and teeth that  
39 are susceptible due to enamel defects (e.g., hypoplasia) and/or frequent consumption of fermentable  
40 carbohydrates [1-3]. Within Canada, day surgery for ECC constitutes 31% of all day surgeries for children  
41 aged 1-5 years, making this the major cause for day surgeries within this age group [4, 5].

42 *In vitro* studies have shown that interkingdom interactions were associated with dysbiosis of the oral  
43 microbiome [6, 7]. Both *Candida albicans* and *Streptococcus mutans* develop symbiotic interactions in the  
44 presence of sucrose that boost their ability to colonize teeth and synergistically enhance virulence which  
45 results in aggressive onset of dental caries lesions [6].

46 Treatment of young children with severe ECC often requires high-cost general anesthesia and advanced  
47 clinical skills which may be unavailable or unaffordable for many pediatric populations [8]. Oral  
48 rehabilitation may involve multiple extractions, restorations and crowns [9]. Children treated under  
49 general anesthesia often develop new or recurrent caries within months of surgical rehabilitation, with  
50 some children requiring subsequent visits to the operating room for dental treatment [10, 11].

51 Traditional treatment modalities do not address causative factors and have not reduced the incidence of  
52 childhood caries and rates for dental surgery in North America [5].

53 Silver diamine fluoride (SDF) is a simple and non-invasive topical fluoride solution to arrest caries in  
54 children. A solution of 38% SDF (Advantage Arrest, Oral Science, Brossard, QC, Canada) contains 25%  
55 silver, 5.5% fluoride, and 8% ammonia. In the pilot study that preceded our current study, Sihra et al.  
56 (2020) concluded that at least two applications of SDF are recommended, with lesion arrest rates of  
57 74.1% and 96.2% after 1 and 2 applications of SDF, respectively [12].

58 Application of SDF in children too young to tolerate restorative procedures can stabilize active caries  
59 until the child is older and able to cooperate for traditional restorative techniques or for minimally  
60 invasive techniques [13]. Since treatment with SDF is non-invasive and easily performed [14], it can be a  
61 useful addition to existing traditional treatment modalities. Primary teeth that have been treated with  
62 SDF and atraumatic techniques can sustain function and act as a space maintainer until eruption of the  
63 permanent successor [14].

64 Previous studies characterized the effect of SDF treatment on the plaque bacteriome [15, 16] and  
65 mechanistic studies investigated the effect of SDF on only few *Candida spp.* [17, 18]. However, the  
66 influence of the application regimen of SDF on the oral mycobiome is not yet studied. The purpose of  
67 this study is to investigate the oral bacteriome and mycobiome changes that result from SDF  
68 applications randomized to three different application frequency regimens. This study is part of a larger  
69 randomized clinical trial to investigate the effectiveness of using SDF to arrest ECC in children.

70

## 71 **Methods**

### 72 ***Study Population, Design, and Sample Collection***

73 The study protocol was approved by the University of Manitoba Biomedical Research Ethics Board  
74 (HS24849-B2021:031) and was registered on ClinicalTrials.gov (NCT04054635). Study visits took place at  
75 the Children’s Hospital Research Institute of Manitoba (**CHRIM**) or at community-based dental clinics in  
76 Winnipeg (Access Downtown, Mount Carmel Clinic and SMILE plus). A total of forty-five children < 72  
77 months of age were recruited based on inclusion and exclusion criteria (**Supplementary Table 1**)  
78 between December 2019 and June 2020 with block randomization by site in order to achieve equal  
79 proportions in each regimen by clinic site of recruitment.

80 All children had ECC and were randomized to three different treatment regimens ( $n = 15$  per group;  
81 **Supplementary Table 2**), in an open-label parallel trial design, using sealed envelopes containing a  
82 regimen number. The sealed envelopes were generated by the research coordinator. When a child was  
83 recruited, a research personnel randomly selected an envelope, assigning the child to one of the groups.  
84 Each treatment protocol was assigned a regimen number (1, 2 and 3) for randomization purposes.  
85 Regimen 1 was the Winnipeg Regional Health Authority (**WRHA**) Oral Health Program Protocol, advising  
86 two applications of SDF four months apart. Our pilot study by Sihra et al. (2020), used the WRHA  
87 protocol so this regimen was chosen as Regimen 1 [12]. Regimen 2 was the protocol suggested by the  
88 American Dental Association (**ADA**), recommending two applications of SDF six months apart [19].  
89 Regimen 3 was the protocol proposed in the American Academy of Pediatric Dentistry (**AAPD**) Clinical  
90 Practice Guideline suggested by Horst, recommending an initial application followed by 2-4 weeks of  
91 monitoring, with reapplication if needed [20-22]. We implemented this as two applications of SDF one  
92 month apart. For simplicity, Regimen 1 (4 months), Regimen 2 (6 months) and Regimen 3 (1 month) will  
93 henceforth be referred to as Regimen 4M, Regimen 6M and Regimen 1M respectively.

94 Written informed consent, by parents or caregivers, was obtained for each child. Dental exams,  
95 assessment of lesions, supragingival plaque collection, and SDF applications were completed by a  
96 dentist. Carious lesions were assessed based on clinical hardness (very soft, medium, or very hard),  
97 colour change (yellow, brown, or black), and size of lesions. The colour, hardness, size, and the dmft  
98 (decayed, missing, and filled primary teeth) scores were recorded for each visit. Hardness was assessed  
99 with light pressure within the lesion using a probe. Teeth were also assessed for pain and/or infection at  
100 each visit. Lesions were deemed arrested if found to be black and very hard.

101 Supragingival plaque samples were taken by scrubbing a sterile interdental brush on all available tooth  
102 surfaces [23, 24]. Samples were then dislodged into 1 mL of RNAprotect Reagent (Qiagen, Hilden,  
103 Germany) and then frozen at  $-80^{\circ}\text{C}$  until DNA extraction. Dental plaque samples were taken at first

104 (baseline), second, and third (final) study visits. Silver Diamine Fluoride 38% (Advantage Arrest, Oral  
105 Science, Canada) was applied to cavitated lesions involving dentin with a microbrush for one minute.  
106 The surface was then wiped with wet gauze or rinsed with water. SDF application was followed by  
107 application of 5% sodium fluoride varnish (NaFV; NuPro White, Dentsply Sirona, USA).

108 Demographic data, arrest rates, and dmft scores were analyzed using NCSS 2022 statistical software  
109 (NCSS, LLC). The data were analyzed using Anova, Kruskal-Wallis, Chi-square, and paired sample t-test,  
110 when appropriate.  $P < 0.05$  was considered significant.

### 111 ***DNA Extraction, 16S and ITS1 rRNA Amplicon Sequencing and Data Analysis***

112 DNA extraction was completed using the DNeasy PowerSoil Pro Kit (Qiagen, Hilden, Germany). The  
113 plaque samples were centrifuged for 10 minutes at 13,000 rpm. The supernatant was then discarded  
114 and 800  $\mu$ L of buffer CD1 was used to re-suspend the resultant pellet. This mix was then added to the  
115 PowerBead Pro Tube and manufacturer's instructions were followed for DNA extractions.

116 The library preparation and paired-end Illumina MiSeq PE300 sequencing of the V4 region of bacterial  
117 *16S rRNA* and fungal *ITS1* (Internal Transcribed Spacer 1) *rRNA* genes were performed by Genome  
118 Quebec Innovation Center. The forward and reverse primers used to amplify the *16S* and *ITS1 rRNA*  
119 genes, respectively, were the V4-16S 515F (GTGCCAGCMGCCGCGGTAA) and 806R  
120 (GGACTACHVGGGTWTCTAAT), and the ITS1-30F (GTCCCTGCCCTTGTACACA) and ITS1-217R  
121 (TTTCGCTGCGTTCTTCATCG) [25].

### 122 ***Bioinformatics and Statistical Analysis***

123 Sequencing data was analyzed using QIIME2 2018.11 (Quantitative Insights into Microbial Ecology) [24,  
124 26]. DADA2 implemented in QIIME2 was used to filter and merge the pair-end sequences, and to obtain  
125 the table of amplicon sequence variants (ASVs) [27]. The ITS1 sequences were trimmed using the Q2-

126 ITSxpress QIIME2 plugin before the DADA2 step [28]. The Human Oral Microbiome Database (HOMD,  
127 version 15.1) and the UNITE database (version 8.2; QIIME developer release) were used for the  
128 taxonomic assignment of bacteria and fungi, respectively, with classify-sklearn naïve Bayes taxonomy  
129 classifier in QIIME2 [23, 29-31]. The fungal ASVs that were assigned only at kingdom level were  
130 submitted to further fungal ASV curation with the R package LULU [32] and the program BLASTN in NCBI  
131 [33]. The ASVs with non-fungal BLASTN results were discarded and the remaining were repeatedly  
132 assigned to new taxonomic assignments using different UNITE databases threshold levels [31, 34, 35]  
133 and taxonomy classification methods (q2-feature-classifier classify-sklearn and classify-consensus-blast)  
134 in QIIME2 [24, 36]. The data was imported into R using the R package “qiime2R” (version 0.99.13) and  
135 additional filtering was performed using “phyloseq” (version 1.30.0) to remove singletons [37, 38]. The  
136 ASV counts were then normalized using the cumulative-sum scaling (CSS) approach from the R package  
137 “metagenomeSeq” version 1.28.2 [39].

138 The alpha diversity analysis was performed using the Shannon index and raw ASV count data in R  
139 (“phyloseq” package, version 1.30.0). Alpha diversity comparisons were done by the Kruskal-Wallis test  
140 or Friedman test as appropriate. Beta diversity analysis was performed on CSS normalized ASV data,  
141 using weighted UniFrac distances and the permutational analysis of variance (PERMANOVA) test with  
142 999 permutations in the R package “vegan” (adonis function; version 2.5.6) [40]. It was visualized using  
143 principle coordinate analysis (PCoA) in the R package “ggplot2” (version 3.3.3) [41].

144 A paired DESeq2 negative binomial Wald test was used to detect differentially abundant species  
145 between groups, controlling the false discovery rate (FDR) for multiple comparison [42]. FDR adjusted  $p$   
146 < 0.05 was considered significant.

## 147 **Results**

### 148 ***Characteristics of Study Participants***

149 Forty-five children, 15 children per group, with mean age of  $43.5 \pm 13.8$  months participated. Seventeen  
150 (37.8%) were female and 28 (62.2%) were male (**Table 1**). One child assigned to Regimen 6M did not  
151 return for follow-up, bringing final sample size to 44 participants and 132 plaque samples. No harm or  
152 unintended effect was observed.

### 153 ***Lesion-Level Analysis***

154 A total of 195 carious lesions in 44 children were treated at baseline and followed over two subsequent  
155 study visits. One child presented with an abscessed SDF-treated tooth at Visit 3 in Regimen 1M and this  
156 lesion was considered a failure i.e., not arrested. Average arrest rates were higher at Visit 2 and Visit 3  
157 for Regimen 4M and Regimen 1M compared to Regimen 6M (**Table 2**). Arrest rates were higher for all  
158 lesions after two applications of SDF, with a statistically significant increase in the arrest rate from Visit 2  
159 to Visit 3 for Regimens 4M ( $P = 0.015$ ) and 1M ( $p < 0.001$ ) (**Table 2**).

160 Average dmft score remained the same between Visit 1, 2, and 3 for Regimen 4M. While for Regimens  
161 1M and 6M, the average dmft increased between Visit 1 and 2 and remained the same at Visit 3 (**Table**  
162 **2**).

### 163 ***Supragingival Plaque Bacterial Community Analysis***

164 The alpha diversity analysis showed no significant difference between visits for all regimens, although a  
165 slight increase in the average diversity can be observed between visits 2 and 3 (Friedman Test,  $p > 0.05$ ;  
166 **Fig. 1A**). Overall, the beta diversity analysis showed no significant differences in the supragingival  
167 plaque bacteriome between visits (**Fig. 1B**).

168 Taxonomic assignment showed that *Streptococcus*, *Corynebacterium* and *Actinomyces* were the most  
169 abundant genera overall (**Fig. 2A**). Remarkably, *Streptococcus mutans* showed a decrease in relative  
170 abundance at Visit 3 compared to Visit 1 for Regimen 4M and Regimen 1M. For Regimen 6M, *S. mutans*



171 showed an increase in relative abundance from Visit 1 to Visit 2 and then a decrease in relative  
172 abundance from Visit 2 to Visit 3 (**Fig. 2B**). However, these changes were not found to be statistically  
173 significant.

174 The differential abundance analysis showed that various bacterial species were significantly enriched or  
175 depleted between Visits 1 and 2 or between Visits 1 and 3 (**Fig. 3** and Supplementary Figure 1-4).

176 Interestingly, compared to the following visits, the supragingival plaque of the children at baseline (Visit  
177 1) was enriched with cariogenic bacteria such as *Lactobacillus spp.* and/or *Bifidobacterium spp.*,  
178 regardless of the regimens (Supplementary Figures 1-4). However, children in Regimen 6M showed  
179 higher abundances of *Lactobacillus salivarius* in Visits 2 and 3 and also higher dmft scores at Visits 2 and  
180 3 and lower arrest rates, compared to the other regimens (Supplementary Figure 3, **Table 2**).

#### 181 ***Supragingival Plaque Fungal Community Analysis***

182 Five samples did not pass quality control filtering steps for the mycobiome data analysis and, due to the  
183 design of the study, a total of eighteen samples were removed to allow for paired analysis of the  
184 remaining 114 plaque samples. The alpha diversity analysis showed no significant differences between  
185 visits for all groups (Friedman Test,  $p > 0.05$ ; **Fig. 4A**). Similarly, the beta diversity analysis showed no  
186 significant difference in supragingival plaque mycobiome between visits for all groups (**Fig. 4B**).

187 Taxonomic assignment showed that *Candida*, *Blumeria*, and *Malassezia* were the most abundant  
188 genera. **Fig. 5** shows the relative abundances of the top 25 most abundant fungal taxa and it shows that  
189 *Candida albicans* was highly abundant in all groups regardless of number of visits or regimens.

190 The differential abundance analysis showed many fungal species that were significantly enriched or  
191 depleted between visits in all Regimens (**Fig. 6** and supplementary Figures 2, 3). We noted that there  
192 was a significant decrease in *Candida tropicalis* from Visit 1 to Visit 3 in Regimen 6M. This decrease was  
193 also seen from Visit 2 to Visit 3 and Visit 1 to Visit 3 when all regimens were taken together. All these

194 results taken together suggest that SDF treatment may have an effect on the abundance of specific fungi  
195 but it does not modify the overall microbial structure of the supragingival plaque.

### 196 ***Link between the baseline microbiome and the SDF treatment outcome***

197 After only one application of SDF, 40.9% ( $n = 18/44$ ) of the children had 100% of the treated caries  
198 lesions arrested. While, 59.1% ( $n = 26/44$ ) of the children had at least one lesion that was not arrested at  
199 Visit 2. Among those children, six had anterior lesions not arrested, 16 had posterior lesions not  
200 arrested, and four had both anterior and posterior lesions not arrested. To evaluate if the baseline  
201 microbiome is linked to SDF treatment outcomes, we compared the baseline microbiome of children  
202 who had 100% of caries arrested after one application of SDF and those with at least one lesion not  
203 arrested after one application of SDF (i.e., at Visit 2). For this we used differential abundance analysis  
204 adjusting for differences in the regimen used and the sex of the child. Interestingly, the dental plaque of  
205 the children with lesions not arrested after one SDF application was enriched with the caries associated  
206 species *S. mutans* and *Candida dubliniensis* at baseline, compared with children who had 100% arrest  
207 rates (**Fig. 7**).

208

## 209 **Discussion**

210 SDF treatment in children too young to tolerate restorative procedures can stabilize active caries until  
211 the child is older and able to cooperate for traditional restorative or minimally invasive techniques [13].  
212 In a pilot study, it was concluded that at least two applications of SDF are recommended, with 96.2% of  
213 arrest rate achieved, which is similar to our findings [12]. Since SDF treatment is non-invasive and easily  
214 performed, it can be a useful addition to existing traditional treatment modalities [14]. Primary teeth  
215 that have been treated with SDF and atraumatic techniques can sustain function and act as a space  
216 maintainer until eruption of the permanent successor [14].

217 ***Lesion-Level Analysis***

218 The current AAPD Clinical Practice Guideline recommends monitoring carious lesions for arrest at 2-4  
219 weeks following application of SDF with reapplication as necessary to achieve arrest of all targeted  
220 lesions and re-care monitoring based on disease activity and caries risk level at three, four, or six months  
221 [22]. SDF is known to have a reservoir effect with sustained antimicrobial effects over time [43].  
222 Application to carious lesions is as effective in preventing caries in other teeth and surfaces as applying  
223 SDF directly [43]. In our study, the average dmft remained the same over all three visits for Regimen 4M  
224 which is consistent with these findings. Average arrest rates were higher for all groups after two  
225 applications of SDF compared to one application of SDF, however, arrest rates were higher with  
226 application frequencies of 1 month and 4 months compared to 6 months.

227 Regimen 6M showed lower arrest rates compared to Regimen 1M and 4M and also showed increased  
228 dmft between Visit 1 and Visits 2 and 3. The literature suggests that increasing the frequency of SDF  
229 application can increase caries arrest rates [22]. The effectiveness of lesion arrest by 38% SDF decreases  
230 over time [22, 44]. Re-activation of treated lesions has been observed in a 2-year study where a single  
231 application of 38% SDF was sufficient to prevent only 50% of the arrested surfaces at six months from  
232 reverting to active lesions again over 24 months [44]. We suggest that six months between applications  
233 may not be optimal for arrest of caries in high-risk children. Other factors which could be influencing  
234 arrest rates and dmft with six months application frequency and that need to be investigated in future  
235 studies include the number of erupted teeth, diet high in fermentable carbohydrates, plaque index,  
236 amount of plaque present in lesions, medical status, and use of antibiotics.

237 ***Microbiome***

238 Previous studies have looked at microbial changes following SDF treatment in pediatric patients [15, 45].  
239 They looked at changes in the bacteriome at the caries lesions only and had smaller sample sizes.

240 Milgrom et al. (2018) found no consistent changes in relative abundance of caries-associated microbes  
241 or lesion-specific microbial diversity before treatment and at follow up (14-21 days) for 3 children from  
242 each group (38% SDF vs placebo) [45]. In our study, no significant differences in alpha or beta diversity  
243 were observed in the overall plaque microbiome after SDF treatment. The lack of loss of diversity  
244 following SDF treatment suggests that the use of SDF is safe with minimal risks of growth of  
245 opportunistic pathogens [45].

246 Mei et al. (2020) found no overall microbiome changes in 5-year-old children immediately before, 2  
247 weeks after, and 12 weeks after, one application of 38% SDF [15]. Microbiota showed a temporal shift in  
248 the positive direction after two weeks but returned to original status after twelve weeks. The authors  
249 noted that *S. mutans* tended to decline in arrested carious lesions while *Neisseria* species and  
250 *Actinomyces naeslundii* tended to increase in arrested carious lesions. Carious lesions that remained  
251 active after SDF treatment showed a trend of increased abundance of *S. mutans*, *S. sobrinus*, and  
252 *Lactobacillus sp.* compared to pre-SDF treatment levels though not all were statistically significant.  
253 Takahashi et al. (2021) have shown that 38% SDF can decrease the number of *S. mutans*, along with the  
254 amount of water-insoluble glucan, and the thickness of the formed biofilm *in vitro* [46]. They suggest  
255 that this may be partially due to an inhibitory effect of silver ions on glucosyltransferase activity (which  
256 is used by *S. mutans* to synthesize extracellular polysaccharides from sucrose) and the rupture of the  
257 bacterial cells. This may explain why the supragingival plaque bacteriome showed a decrease in relative  
258 abundance from Visit 1 to Visit 3 for *S. mutans* for all regimens, however, this trend was not found to be  
259 statistically significant (Fig. 2B).

260 It was also noted that the plaque microbiome was depleted of other cariogenic bacteria and *Candida*  
261 species after two applications of SDF. For instance, when all regimens were taken together, *L. salivarius*  
262 was enriched in Visit 1 compared to Visit 2 and Visit 3, signifying a decrease in abundance from Visit 1 to

263 Visit 3. *L. salivarius* is known to be a dominant species commonly isolated from the dentition of adults  
264 and children with caries [47].

265 High levels of *Candida albicans* are frequently detected in the plaque biofilms of children with ECC [48-  
266 50]. Other *Candida* species such as *Candida tropicalis*, *Candida krusei* and *Candida glabrata* are also  
267 detected in plaque biofilms of children with ECC, though not in the numbers of *C. albicans* [48]. In our  
268 previous study on the characterization of the oral microbiome in children with S-ECC, we found that *C.*  
269 *dubliniensis* and *C. tropicalis* were more abundant in oral swab samples of children with S-ECC compared  
270 to caries-free controls [24]. In contrast, healthy, ECC-free children have plaque biofilms where *C.*  
271 *albicans* is absent or sporadically detected [48-50]. *Candida albicans* was found to be highly abundant in  
272 all groups regardless of the number of visits or regimens. Our differential abundance analysis showed  
273 many fungal species that were significantly enriched or depleted between Visits 1 and 2 or between  
274 Visits 1 and 3 suggesting that SDF treatment may have an effect on the abundance of specific fungi. A  
275 study by Fakhruddin et al. (2020) has shown that SDF has antifungal effects against some *Candida*  
276 species including *C. albicans*, *C. krusei*, *C. tropicalis* and *C. glabrata* [17].

### 277 **Limitations**

278 Although our sample size was larger than that of previous SDF studies examining the oral microbiome,  
279 our sample size was small, and that could be partially attributed to the recruitment of participants  
280 during the COVID-19 pandemic and the limited funding for sequencing. Furthermore, although the same  
281 number of children were recruited for each group, the total number of teeth treated per group varied,  
282 with the Regimen 1 having the highest number of teeth treated (74) and the Regimen 6 having the  
283 lowest number of teeth treated (53), due to the loss of one participant in Regimen 6. Furthermore, in  
284 this study, plaque samples were not site-specific and so data on the microbiome could not be localized

285 to the site of the carious lesion. Comparing overall microbiome changes with site-specific changes would  
286 help determine whether SDF has a more pronounced local effect than overall oral microbiome effect.

287 Most oral fungi are present at low biomass and may be difficult to detect in oral samples [51]. In our  
288 study, five samples had low number of sequence reads and a total of eighteen samples had to be  
289 removed to allow for paired analysis. As the study focused on ECC and included only children younger  
290 than 6 years of age, our findings cannot be generalized for all age groups.

291

## 292 **Conclusions**

293 SDF with NaFV was an effective modality for arresting dental caries with higher arrest rates for all  
294 lesions after two applications. Application of SDF 1 month and 4 months apart had higher arrest rates  
295 than application 6 months apart suggesting that six months between applications may not be optimal  
296 for arrest of caries in high-risk children.

297 No significant loss of microbial diversity was seen after SDF treatment. Moreover, significant changes in  
298 the abundance of bacterial and fungal species, particularly caries-associated species, were identified.  
299 This study provides information on the effect of SDF treatment on the overall dental plaque microbiome  
300 of young children with ECC. Further studies with a larger sample size are needed to confirm whether  
301 the presence or absence of various bacterial and fungal species are the result of SDF applications at  
302 various frequencies.

## 303 **Acknowledgements**

304 We thank the parents/caregivers, participants, and the staff at the community-based dental clinics in  
305 Winnipeg (Access Downtown, Mount Carmel Clinic, and SMILE+).

306

307 **Statement of Ethics**

308 Study approval statement: The study protocol was approved by the University of Manitoba Biomedical  
309 Research Ethics Board (HS24849-B2021:031).

310 Consent to participate statement: Written informed consent, by parents or caregivers, was obtained for  
311 each child.

312 **Conflict of Interest Statement**

313 The authors have no conflicts of interest to declare.

314 **Funding Sources**

315 Operating funds for this project were provided by the Children’s Hospital Research Institute of Manitoba  
316 and the Dr. Gerald Niznick College of Dentistry Endowment Fund. Dr. R.J. Schroth holds a Canadian  
317 Institute of Health Research Embedded Clinician Researcher Salary Award in “improving access to oral  
318 health care and oral health care delivery for at-risk young children in Manitoba.”

319 **Author Contributions**

320 M.M. contributed to data acquisition, data analysis, data interpretation, and writing, critically revised  
321 the paper, and approved the final version. V.C.J. contributed to data acquisition, data analysis, data  
322 interpretation, and writing, critically revised the paper, and approved the final version. B.M, V.K.L., and  
323 S.S. contributed to data acquisition, critically revised the paper, and approved the final version. M.B. and  
324 P.C. contributed to study design and data interpretation, critically revised the paper, and approved the  
325 final version. R.J.S. conceived the idea for this study, contributed to study design, data acquisition, data  
326 interpretation, and writing, critically revised the paper, and approved the final version.

327 **References**

- 328 1 American Academy of Pediatric Dentistry. Policy on early childhood caries (ECC): Classifications,  
329 consequences, and preventive strategies. The Reference Manual of Pediatric Dentistry. Chicago, Ill.:  
330 American Academy of Pediatric Dentistry; 2020:79-81.
- 331 2 Dzidic M, Collado MC, Abrahamsson T, Artacho A, Stensson M, Jenmalm MC, et al. Oral  
332 microbiome development during childhood: an ecological succession influenced by postnatal factors and  
333 associated with tooth decay. *Isme j.* 2018;12(9):2292-306. doi: 10.1038/s41396-018-0204-z. PubMed  
334 Central PMCID: PMC6092374.
- 335 3 Gross EL, Beall CJ, Kutsch SR, Firestone ND, Leys EJ, Griffen AL. Beyond *Streptococcus mutans*:  
336 dental caries onset linked to multiple species by 16S rRNA community analysis. *PLoS One.*  
337 2012;7(10):e47722. Epub 2012/10/24. doi: 10.1371/journal.pone.0047722. PubMed PMID: 23091642;  
338 PubMed Central PMCID: PMC3472979.
- 339 4 Canadian Institute for Health Information. Treatment of preventable dental cavities in  
340 preschoolers: a focus on day surgery under general anesthesia. Canadian Institute for Health  
341 Information (CIHI) Ottawa, ON; 2013. p. 1-34.
- 342 5 Schroth RJ, Quiñonez C, Shwart L, Wagar B. Treating early childhood caries under general  
343 anesthesia: A national review of Canadian data. *J Can Dent Assoc.* 2016;82:g20. Epub 2016/08/23.  
344 PubMed PMID: 27548666.
- 345 6 Falsetta ML, Klein MI, Colonne PM, Scott-Anne K, Gregoire S, Pai C-H, et al. Symbiotic  
346 relationship between *Streptococcus mutans* and *Candida albicans* synergizes virulence of plaque  
347 biofilms in vivo. *Infect Immun.* 2014;82(5):1968-81.
- 348 7 Xiao J, Grier A, Faustoferri R, Alzoubi S, Gill A, Feng C, et al. Association between oral *Candida*  
349 and bacteriome in children with severe ECC. *J Dent Res.* 2018;97(13):1468-76.
- 350 8 Casamassimo PS, Thikkurissy S, Edelstein BL, Maiorini E. Beyond the dmft: the human and  
351 economic cost of early childhood caries. *J Am Dent Assoc.* 2009;140(6):650-7. Epub 2009/06/06. doi:  
352 10.14219/jada.archive.2009.0250. PubMed PMID: 19491160.
- 353 9 Hajishengallis E, Parsaei Y, Klein MI, Koo H. Advances in the microbial etiology and pathogenesis  
354 of early childhood caries. *Mol Oral Microbiol.* 2017;32(1):24-34.
- 355 10 Berkowitz RJ, Amante A, Kopycka-Kedzierawski DT, Billings RJ, Feng C. Dental caries recurrence  
356 following clinical treatment for severe early childhood caries. *Pediatric dentistry.* 2011;33(7):510-4.
- 357 11 Schroth RJ, Smith WF. A review of repeat general anesthesia for pediatric dental surgery in  
358 Alberta, Canada. *Pediatr Dent.* 2007;29(6):480-7. Epub 2008/02/08. PubMed PMID: 18254418.
- 359 12 Sihra R, Schroth RJ, Bertone M, Martin H, Patterson B, Mittermuller BA, et al. The effectiveness  
360 of silver diamine fluoride and fluoride varnish in arresting caries in young children and associated oral  
361 health-related quality of life. *J Can Dent Assoc.* 2020;86:k9. Epub 2020/06/17. PubMed PMID: 32543369.
- 362 13 Jiang M, Wong MCM, Chu CH, Dai L, Lo ECM. A 24-month randomized controlled trial on the  
363 success rates of restoring untreated and SDF-treated dentine caries lesions in primary teeth with the  
364 ART approach. *J Dent.* 2020;100:103435.
- 365 14 Gao SS, Zhao IS, Hiraishi N, Duangthip D, Mei ML, Lo ECM, et al. Clinical trials of silver diamine  
366 fluoride in arresting caries among children: A systematic review. *JDR Clin Trans Res.* 2016;1(3):201-10.  
367 Epub 2016/10/01. doi: 10.1177/2380084416661474. PubMed PMID: 30931743.
- 368 15 Mei ML, Yan Z, Duangthip D, Niu JY, Yu OY, You M, et al. Effect of silver diamine fluoride on  
369 plaque microbiome in children. *J Dent.* 2020;102:103479. Epub 2020/09/21. doi:  
370 10.1016/j.jdent.2020.103479. PubMed PMID: 32950631.



371 16 Mitwalli H, Mourao MDA, Dennison J, Yaman P, Paster BJ, Fontana M. Effect of silver diamine  
372 fluoride treatment on microbial profiles of plaque biofilms from root/cervical caries lesions. *Caries Res.*  
373 2019;53(5):555-66. Epub 20190528. doi: 10.1159/000499578. PubMed PMID: 31137026.

374 17 Fakhruddin KS, Egusa H, Ngo HC, Panduwawala C, Pesee S, Venkatachalam T, et al. Silver  
375 diamine fluoride (SDF) used in childhood caries management has potent antifungal activity against oral  
376 *Candida* species. *BMC Microbiol.* 2020;20(1):95. Epub 2020/04/17. doi: 10.1186/s12866-020-01776-w.  
377 PubMed PMID: 32295517; PubMed Central PMCID: PMC7161255.

378 18 Alshahni RZ, Alshahni MM, Hiraishi N, Makimura K, Tagami J. Effect of silver diamine fluoride on  
379 reducing *Candida albicans* adhesion on dentine. *Mycopathologia.* 2020;185(4):691-8. Epub 20200724.  
380 doi: 10.1007/s11046-020-00473-6. PubMed PMID: 32710393.

381 19 Slayton RL, Urquhart O, Araujo MWB, Fontana M, Guzmán-Armstrong S, Nascimento MM, et al.  
382 Evidence-based clinical practice guideline on nonrestorative treatments for carious lesions: A report  
383 from the American Dental Association. *J Am Dent Assoc.* 2018;149(10):837-49.e19. Epub 2018/09/29.  
384 doi: 10.1016/j.adaj.2018.07.002. PubMed PMID: 30261951.

385 20 Rosenblatt A, Stamford TC, Niederman R. Silver diamine fluoride: a caries "silver-fluoride bullet".  
386 *J Dent Res.* 2009;88(2):116-25. Epub 2009/03/13. doi: 10.1177/0022034508329406. PubMed PMID:  
387 19278981.

388 21 Horst JA, Fontana M. Silver fluoride as a treatment for dental caries. *Adv Dent Res.*  
389 2018;29(1):135-40. Epub 2018/01/23. doi: 10.1177/0022034517743750. PubMed PMID: 29355428;  
390 PubMed Central PMCID: PMC6699125.

391 22 Crystal YO, Marghalani AA, Ureles SD, Wright JT, Sulyanto R, Divaris K, et al. Use of silver diamine  
392 fluoride for dental caries management in children and adolescents, including those with special health  
393 care needs. *Pediatr Dent.* 2017;39(5):135-45. Epub 2017/10/27. PubMed PMID: 29070149.

394 23 Agnello M, Marques J, Cen L, Mittermuller B, Huang A, Chaichanasakul Tran N, et al. Microbiome  
395 associated with severe caries in Canadian First Nations children. *J Dent Res.* 2017;96(12):1378-85. Epub  
396 2017/07/16. doi: 10.1177/0022034517718819. PubMed PMID: 28709393; PubMed Central PMCID:  
397 PMC5652857.

398 24 de Jesus VC, Khan MW, Mittermuller B, Duan K, Hu P, Schroth RJ, et al. Characterization of  
399 supragingival plaque and oral swab microbiomes in children with severe early childhood caries. *Front*  
400 *Microbiol.* 2021;12:683685. Epub 2021/07/13. doi: 10.3389/fmicb.2021.683685. PubMed PMID:  
401 34248903; PubMed Central PMCID: PMC8267818.

402 25 Usyk M, Zolnik CP, Patel H, Levi MH, Burk RD. Novel ITS1 fungal primers for characterization of  
403 the mycobiome. *mSphere.* 2017;2(6). doi: 10.1128/msphere.00488-17.

404 26 Bolyen E, Rideout JR, Dillon MR, Bokulich NA, Abnet CC, Al-Ghalith GA, et al. Reproducible,  
405 interactive, scalable and extensible microbiome data science using QIIME 2. *Nat Biotechnol.*  
406 2019;37(8):852-7. Epub 2019/07/26. doi: 10.1038/s41587-019-0209-9. PubMed PMID: 31341288;  
407 PubMed Central PMCID: PMC7015180.

408 27 Callahan BJ, McMurdie PJ, Rosen MJ, Han AW, Johnson AJA, Holmes SP. DADA2: High-resolution  
409 sample inference from Illumina amplicon data. *Nat Methods.* 2016;13(7):581-3.

410 28 Rivers AR, Weber KC, Gardner TG, Liu S, Armstrong SD. ITSxpress: Software to rapidly trim  
411 internally transcribed spacer sequences with quality scores for marker gene analysis. *F1000Research.*  
412 2018;7.

413 29 Dewhirst FE, Chen T, Izard J, Paster BJ, Tanner AC, Yu W-H, et al. The human oral microbiome. *J*  
414 *Bacteriol.* 2010;192(19):5002-17.

415 30 de Jesus VC, Shikder R, Oryniak D, Mann K, Alamri A, Mittermuller B, et al. Sex-based diverse  
416 plaque microbiota in children with severe caries. *J Dent Res.* 2020;99(6):703-12.

417 31 Abarenkov K, Zirk A, Piirmann T, Pöhönen R, Ivanov F, Nilsson HR, Kõljalg U. 2020a. UNITE QIIME  
418 release for Fungi. Version 04022020 UNITE Community.

419 32 Frøslev TG, Kjølner R, Bruun HH, Ejrnæs R, Brunbjerg AK, Pietroni C, et al. Algorithm for post-  
420 clustering curation of DNA amplicon data yields reliable biodiversity estimates. *Nat Commun.*  
421 2017;8(1):1-11.

422 33 Zhang Z, Schwartz S, Wagner L, Miller W. A greedy algorithm for aligning DNA sequences. *J*  
423 *Comput Biol.* 2000;7(1-2):203-14.

424 34 Abarenkov K, Zirk A, Piirmann T, Pöhönen R, Ivanov F, Nilsson HR, Kõljalg U. 2020b. UNITE QIIME  
425 release for Fungi 2. Version 04022020 UNITE Community.

426 35 Abarenkov K, Zirk A, Piirmann T, Pöhönen R, Ivanov F, Nilsson HR, Kõljalg U. 2020c. UNITE QIIME  
427 release for eukaryotes 2. Version 04022020 UNITE Community.

428 36 Martinsen EM, Eagan TM, Leiten EO, Haaland I, Husebø GR, Knudsen KS, et al. The pulmonary  
429 mycobiome—A study of subjects with and without chronic obstructive pulmonary disease. *PloS one.*  
430 2021;16(4):e0248967.

431 37 McMurdie PJ, Holmes S. phyloseq: an R package for reproducible interactive analysis and  
432 graphics of microbiome census data. *PloS one.* 2013;8(4):e61217.

433 38 Bisanz J. 2018. qiime2R: Importing QIIME2 artifacts and associated data into R sessions. GitHub.  
434 <https://github.com/jbisanz/qiime2R>.

435 39 Paulson JN, Stine OC, Bravo HC, Pop M. Differential abundance analysis for microbial marker-  
436 gene surveys. *Nat Methods.* 2013;10(12):1200-2.

437 40 Anderson MJ. Permutation tests for univariate or multivariate analysis of variance and  
438 regression. *Can J Fish Aquat Sci.* 2001;58(3):626-39.

439 41 Wickham H. 2016. ggplot2. Springer-Verlag New York. ISBN 978-3-319-24277-4 (Use R!).  
440 [accessed 2021 Feb 24]. <http://link.springer.com/10.1007/978-3-319-24277-4>.

441 42 Love MI, Huber W, Anders S. Moderated estimation of fold change and dispersion for RNA-seq  
442 data with DESeq2. *Genome Biol.* 2014;15(12):1-21.

443 43 Horst JA, Ellenikotis H, Milgrom PL. UCSF protocol for caries arrest using silver diamine fluoride:  
444 Rationale, indications and consent. *J Calif Dent Assoc.* 2016;44(1):16-28. Epub 2016/02/24. PubMed  
445 PMID: 26897901; PubMed Central PMCID: PMC4778976.

446 44 Yee R, Holmgren C, Mulder J, Lama D, Walker D, van Palenstein Helderma W. Efficacy of silver  
447 diamine fluoride for arresting caries treatment. *J Dent Res.* 2009;88(7):644-7.

448 45 Milgrom P, Horst JA, Ludwig S, Rothen M, Chaffee BW, Lyalina S, et al. Topical silver diamine  
449 fluoride for dental caries arrest in preschool children: A randomized controlled trial and microbiological  
450 analysis of caries associated microbes and resistance gene expression. *J Dent.* 2018;68:72-8. Epub  
451 2017/09/04. doi: 10.1016/j.jdent.2017.08.015. PubMed PMID: 28866468; PubMed Central PMCID:  
452 PMC5748247.

453 46 Takahashi M, Matin K, Matsui N, Shimizu M, Tsuda Y, Uchinuma S, et al. Effects of silver diamine  
454 fluoride preparations on biofilm formation of *Streptococcus mutans*. *Dent Mater J.* 2021;40(4):911-7.  
455 Epub 20210318. doi: 10.4012/dmj.2020-341. PubMed PMID: 33731542.

456 47 Caufield PW, Schön CN, Saraithong P, Li Y, Argimón S. Oral lactobacilli and dental caries: A model  
457 for niche adaptation in humans. *J Dent Res.* 2015;94(9 Suppl):110s-8s. Epub 20150310. doi:  
458 10.1177/0022034515576052. PubMed PMID: 25758458; PubMed Central PMCID: PMC4547204.

459 48 de Carvalho FG, Silva DS, Hebling J, Spolidorio LC, Spolidorio DMP. Presence of *mutans*  
460 *streptococci* and *Candida* spp. in dental plaque/dentine of carious teeth and early childhood caries. *Arch*  
461 *Oral Biol.* 2006;51(11):1024-8.

462 49 Raja M, Hannan A, Ali K. Association of oral candidal carriage with dental caries in children.  
463 *Caries Res.* 2010;44(3):272-6.

464 50 Yang XQ, Zhang Q, Lu LY, Yang R, Liu Y, Zou J. Genotypic distribution of *Candida albicans* in  
465 dental biofilm of Chinese children associated with severe early childhood caries. *Arch Oral Biol.*  
466 2012;57(8):1048-53.

467 51 Diaz P, Dongari-Bagtzoglou A. Critically appraising the significance of the oral mycobiome. J Dent  
468 Res. 2021;100(2):133-40.  
469  
470

**Table 1.** Characteristics of study participants.

| <b>Age at Baseline (months)</b> |                    | <b>p-value</b>    |      |
|---------------------------------|--------------------|-------------------|------|
| <b>Mean ± SD</b>                |                    |                   |      |
| <b>Total</b>                    | <b>43.5 ± 13.8</b> |                   |      |
| Regimen 1M                      | 43.7 ± 14.15       | 0.09              |      |
| Regimen 4M                      | 41.6 ± 12.7        |                   |      |
| Regimen 6M                      | 45.2 ± 15.1        |                   |      |
| <b>Sex, n (%)</b>               | <b>Female</b>      | <b>Male</b>       |      |
| <b>Total</b>                    | <b>17 (37.8%)</b>  | <b>28 (62.2%)</b> |      |
| Regimen 1M                      | 4 (26.7%)          | 11 (73.3%)        | 0.51 |
| Regimen 4M                      | 7 (46.7%)          | 8 (53.3%)         |      |
| Regimen 6M                      | 6 (40%)            | 9 (60%)           |      |

**Table 2.** Average dmft score and arrest rates.

|              | Average dmft |             |             | Average Arrest Rate                    |                                        |
|--------------|--------------|-------------|-------------|----------------------------------------|----------------------------------------|
|              | Visit 1      | Visit 2     | Visit 3     | Visit 2                                | Visit 3                                |
| Regimen 1M   | 6.67         | 6.73        | 6.73        | 81.1% (60/74)                          | 95.9% (71/74)                          |
| Regimen 4M   | 6.40         | 6.40        | 6.40        | 80.9% (55/68)                          | 98.5% (67/68)                          |
| Regimen 6M   | 6.79         | 6.93        | 6.93        | 62.3% (33/53)                          | 81.1% (43/53)                          |
| <b>Total</b> | <b>6.61</b>  | <b>6.68</b> | <b>6.68</b> | <b>75.9%<sup>a</sup><br/>(148/195)</b> | <b>92.8%<sup>b</sup><br/>(181/195)</b> |

dmft: decayed, missing, and filled primary teeth.

<sup>a</sup> There was a significant difference between Regimens 1M, 4M, and 6M at visit 2 (Pearson's Chi-square test,  $p < 0.05$ ).

<sup>b</sup> There was a significant difference between Regimens 1M, 4M, and 6M at visit 3 (Pearson's Chi-square test,  $p < 0.05$ ).

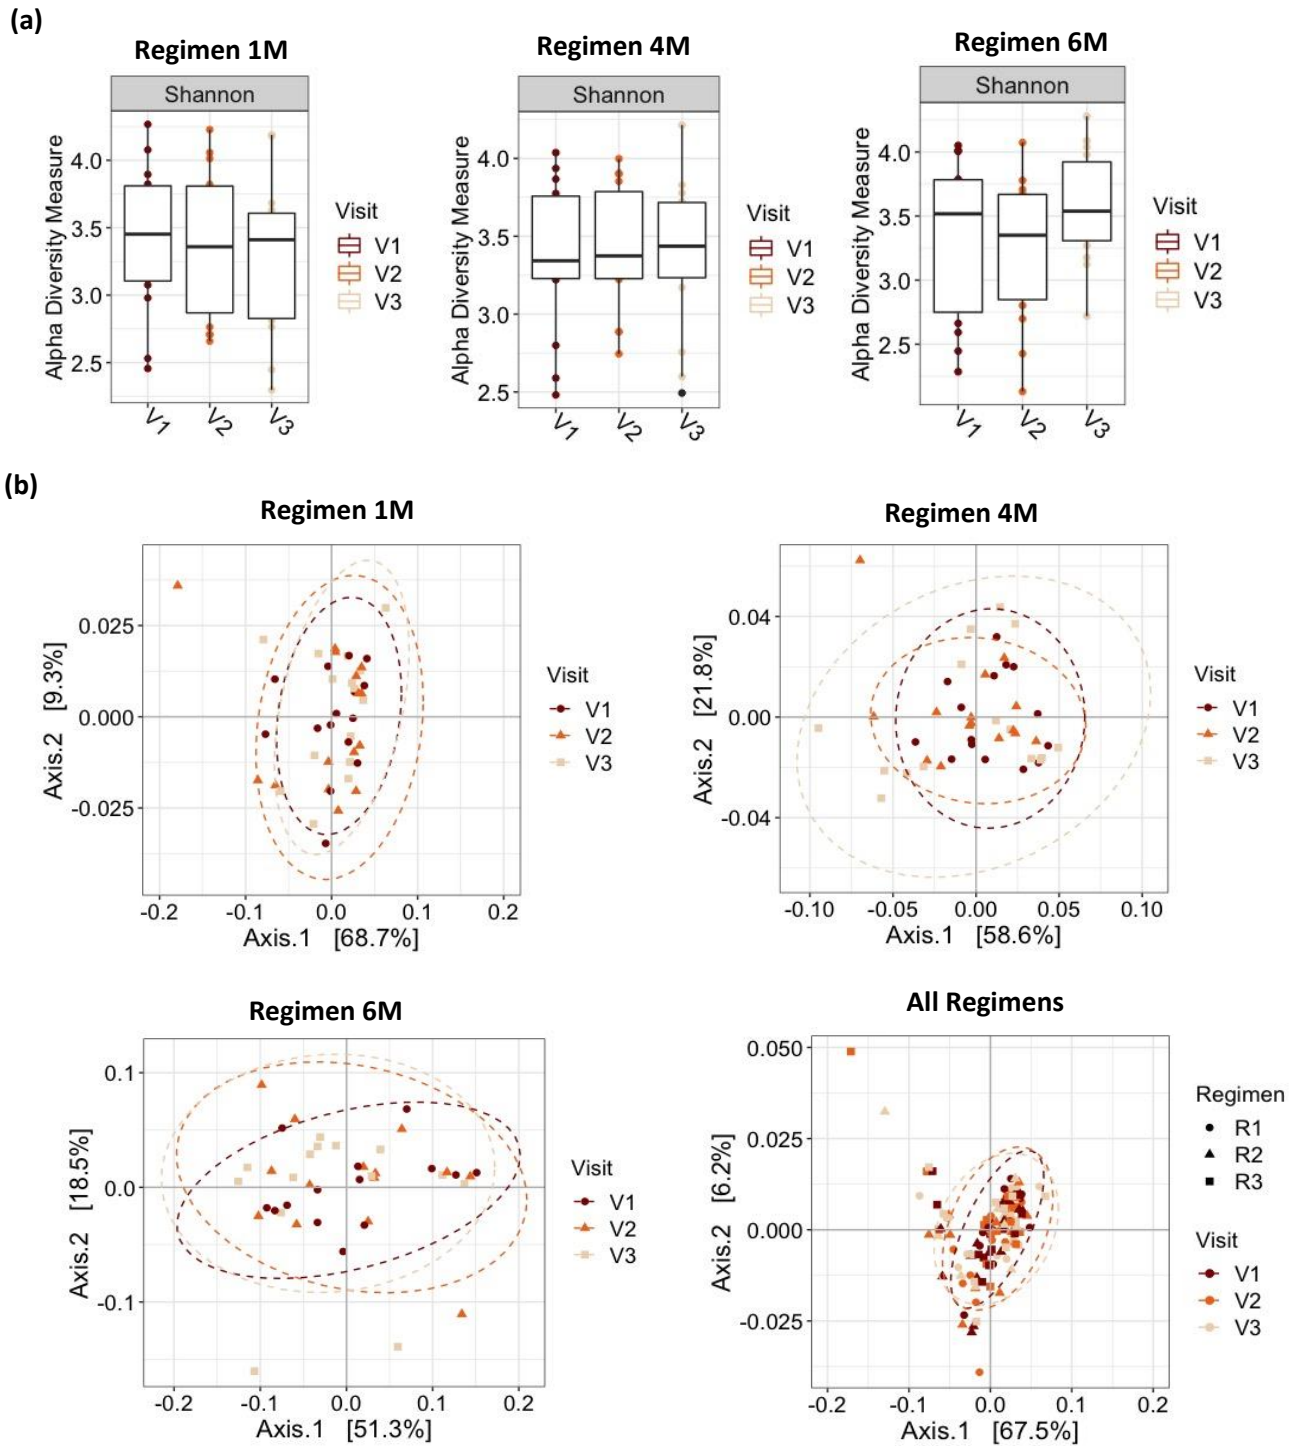

**Figure 1.** Alpha and beta diversity analyses. (a) Alpha diversity analysis. Boxplot of Shannon Index for bacterial taxa in Regimen 1M, Regimen 4M and Regimen 6M and subgroup analysis by visit. The line inside the box represents the median. Whiskers represent the lowest and highest values within the 1.5 interquartile range. (b) Beta diversity analysis. Principal coordinate analysis plots of weighted UniFrac distances based on the overall structure of the supragingival plaque bacteriome. Each data point represents a sample, coloured according to visit. The ellipses represent a 95% confidence level. No significant separation was observed between regimens or visits.

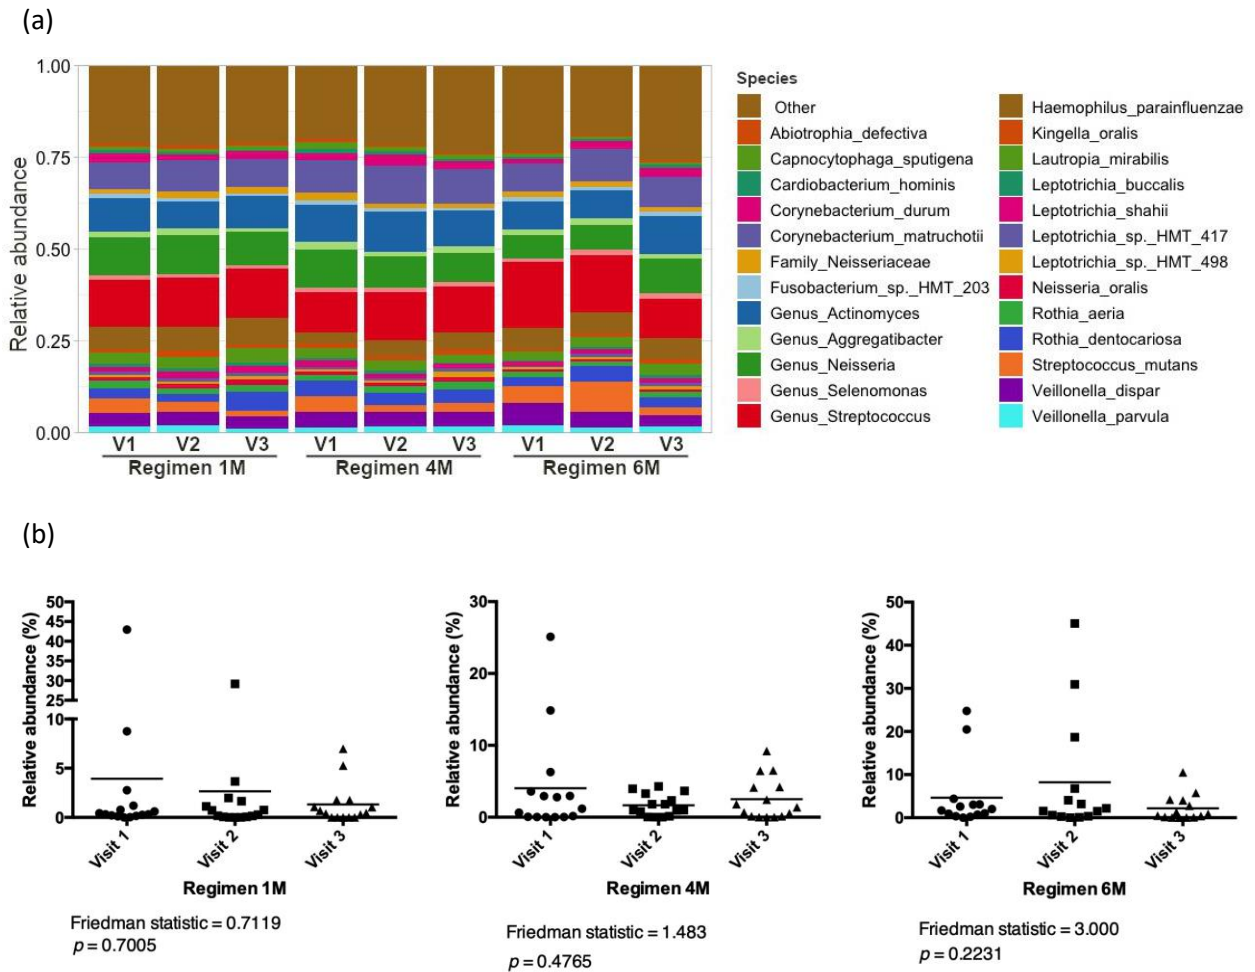

**Figure 2.** Bacterial taxonomic profile of dental plaque and relative abundance of *Streptococcus mutans*. (a) Taxonomic profiles of dental plaque according to regimen and visit, at bacterial species level. Colours were assigned only to the top 25 most abundant taxa. (b) Relative abundance of *S. mutans* according to regimen and visit.

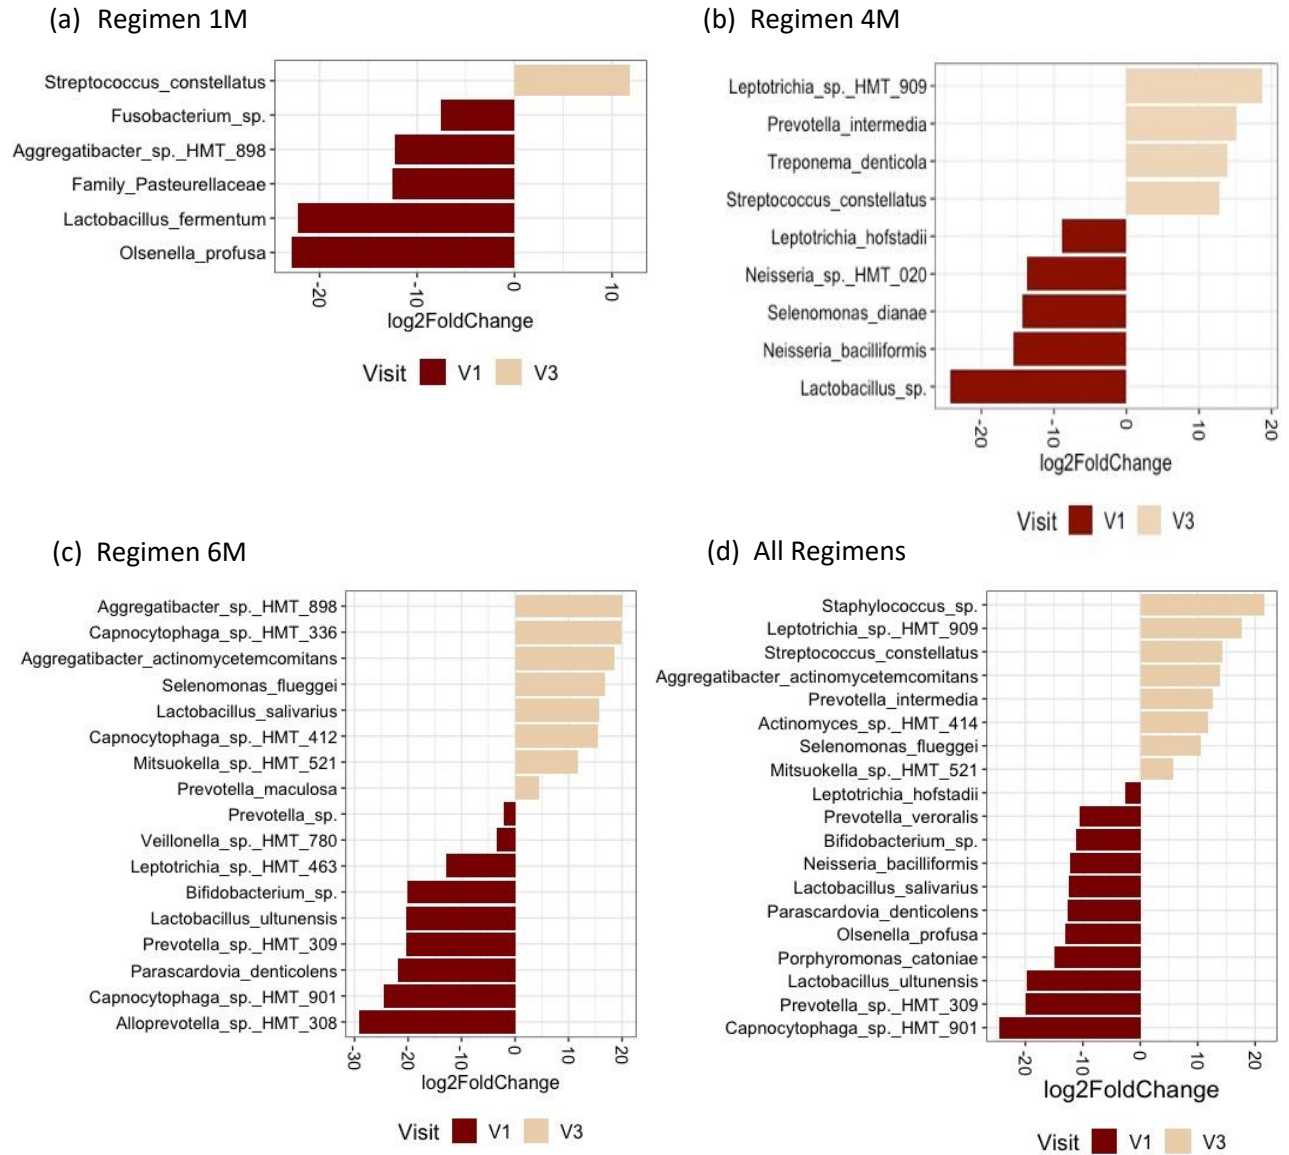

**Figure 3.** Differential abundance analysis for bacterial species comparing visits 1 and 3. The figure shows the relative fold change in bacterial abundance between visits 1 and 3 in (a) Regimen 1M, (b) Regimen 4M, (c) Regimen 6M, and (d) All regimens together. Only bacterial taxa with FDR adjusted  $p < 0.05$  are shown.



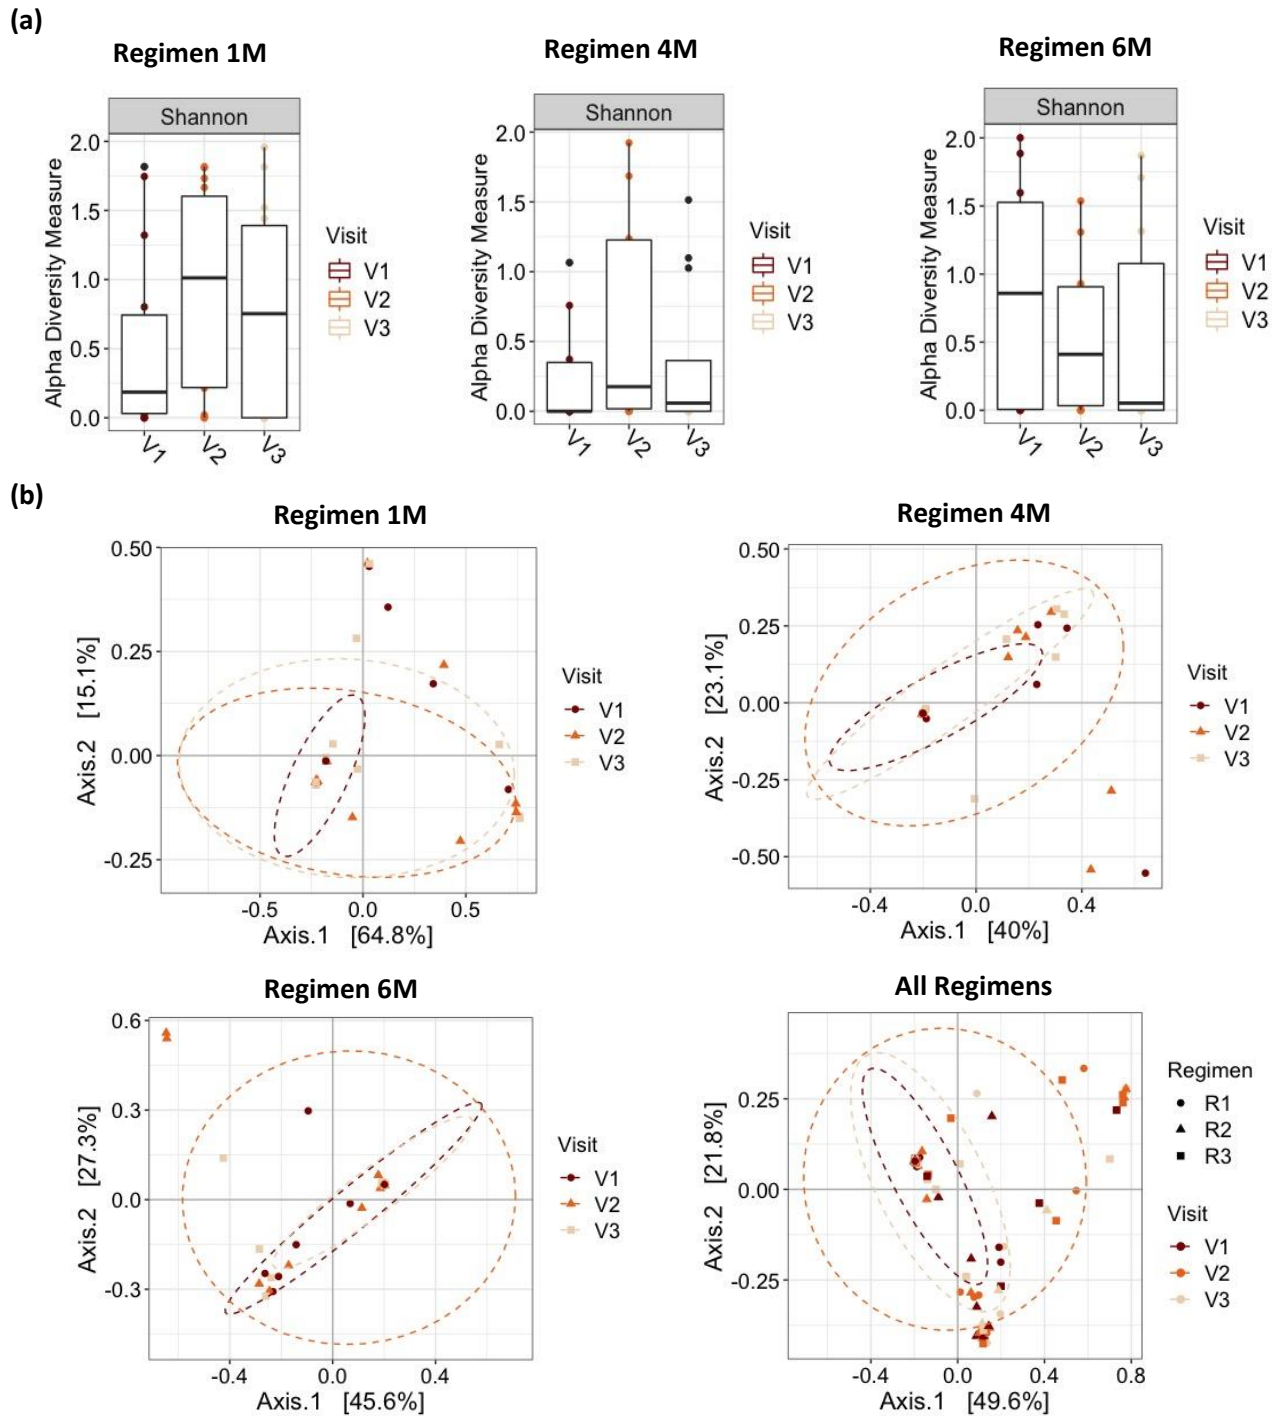

**Figure 4.** Alpha and beta diversity analyses of fungal microbiome. (a) Alpha diversity analysis. Boxplot of Shannon Index for fungal taxa in Regimen 1M, Regimen 4M and Regimen 6M and subgroup analysis by visit. The line inside the box represents the median. Whiskers represent the lowest and highest values within the 1.5 interquartile range. (b) Beta diversity analysis of fungal communities. Principal coordinate analysis plots of weighted UniFrac distances based on the overall structure of the supragingival plaque mycobiome. Each data point represents a sample, coloured according to visit. The ellipses represent a 95% confidence level. No significant separation of samples was noted between regimens or visits.

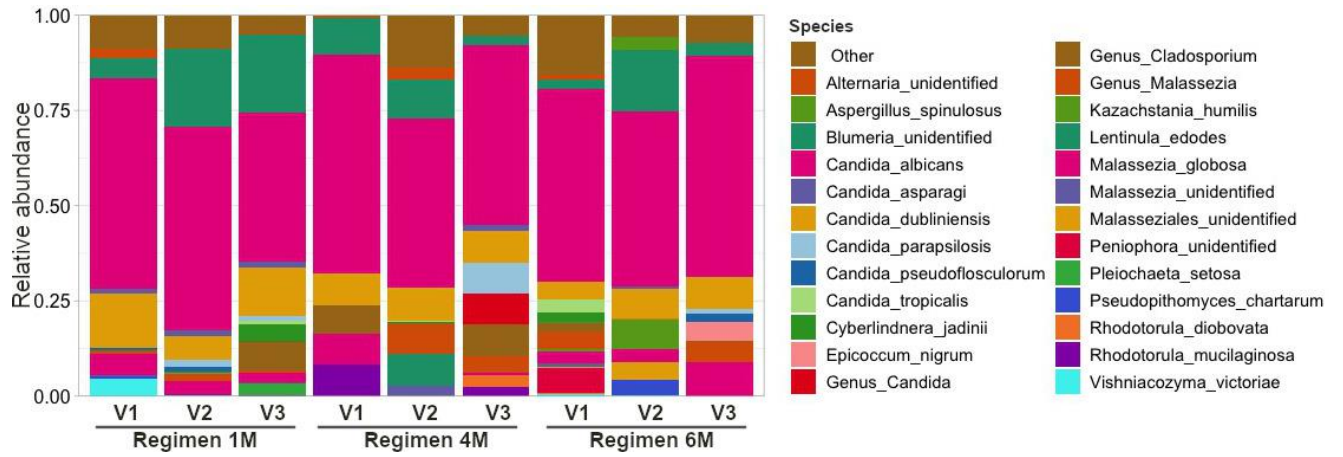

**Figure 5.** Taxonomic profiles of the children’s dental plaque according to regimen and visit, at fungal species level. Colours were assigned only to the top 25 most abundant taxa.

(a) Regimen 1M

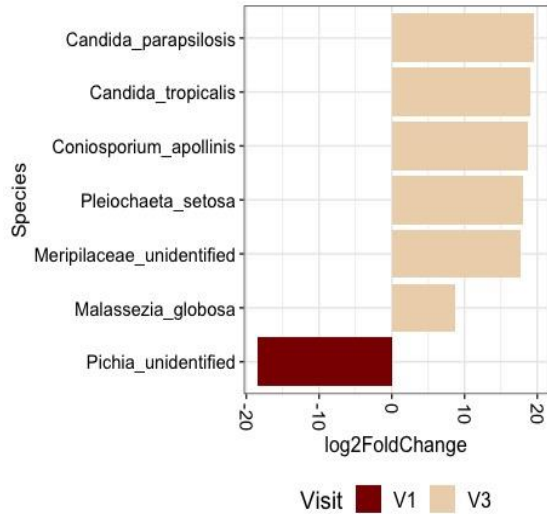

(b) Regimen 4M

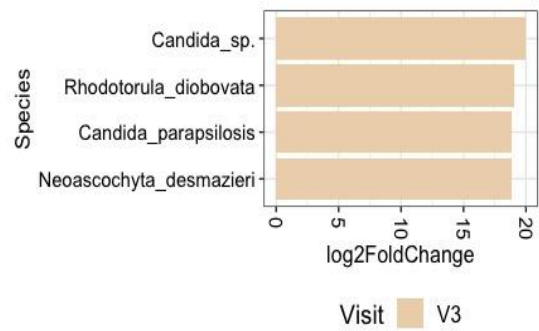

(c) Regimen 6M

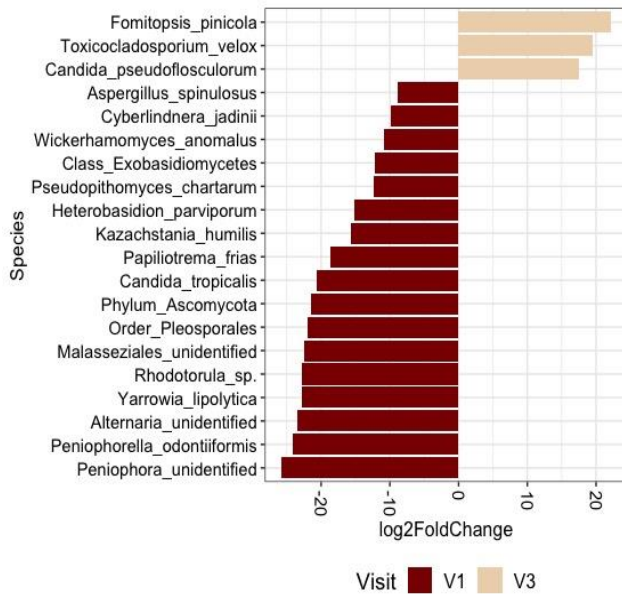

(d) All Regimens

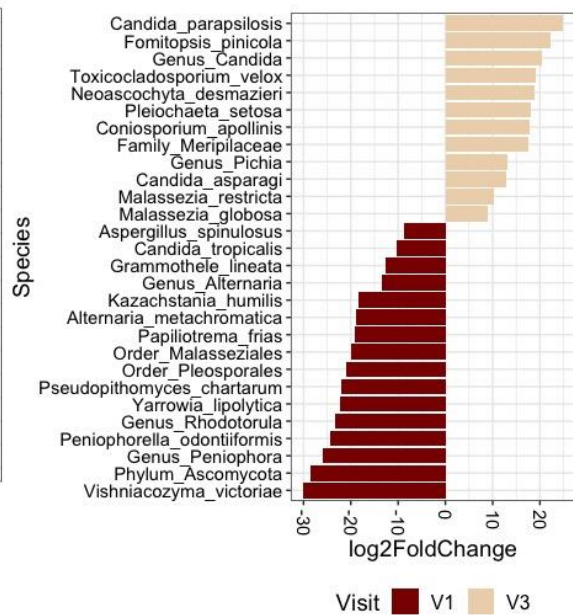

**Figure 6.** Differential abundance analysis for fungal species comparing visits 1 and 3. The figure shows the relative fold change in fungal abundance between visits 1 and 3 in (a) Regimen 1M, (b) Regimen 4M, (c) Regimen 6M, and (d) All regimens together. Only fungal taxa with FDR adjusted  $p < 0.05$  are shown.

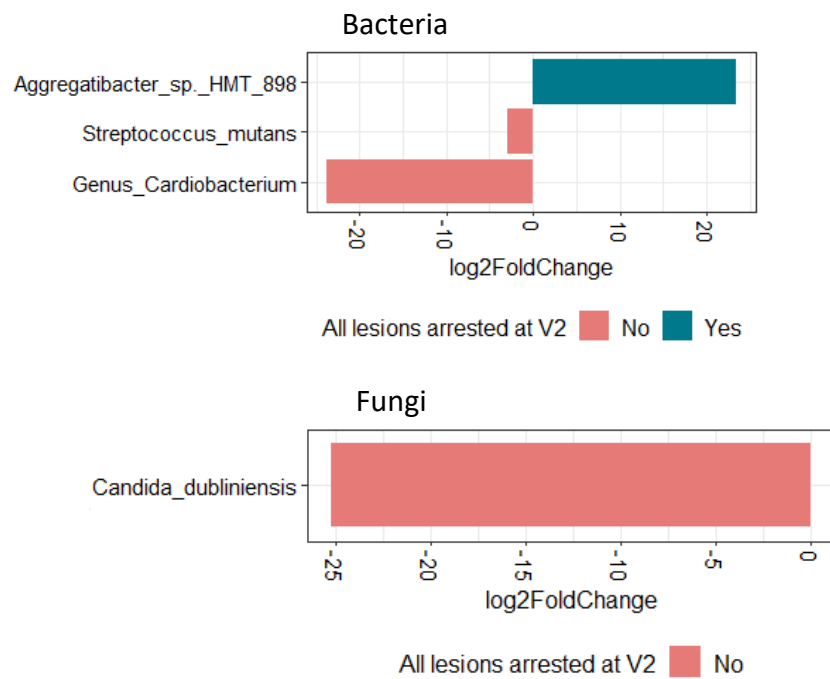

**Figure 7.** Differential abundance analysis comparing the differences in the baseline microbiome between the children who had 100% of the lesions arrested (Yes) and those with <100% arrest rates (No) after one SDF application. Only baseline (before SDF treatment) microbiome data was used for the analysis.
